1 **The day-to-day experiences of caring for children with Osteogenesis Imperfecta:**

2 **A qualitative descriptive study**

3

4 **Please cite as:**

5 Castro, A. R., Marinello, J., Chougui, K., Morand, M., Bilodeau, C., & Tsimicalis, A.  
6 (2019). The day-to-day experiences of caring for children with Osteogenesis  
7 Imperfecta: A qualitative descriptive study. medRxiv, 19007187. doi:10.1101/19007187

8

**Authors**

9 Aimee R. Castro<sup>a,b</sup> MSc  
10 Jessica Marinello<sup>a,b</sup>, BSc  
11 Khadidja Chougui<sup>b</sup>, BA  
12 Marilyn Morand<sup>b</sup>, BSc  
13 Claudette Bilodeau<sup>b</sup>, BSc RN  
14 Argerie Tsimicalis<sup>a,b</sup>, PhD RN

15

16 <sup>a</sup>*Ingram School of Nursing, McGill University, Montréal, Canada*

17 <sup>b</sup>*Shriners Hospitals for Children-Canada, Montréal, Canada*

18

19 **Corresponding author:**

20 Dr. Argerie Tsimicalis  
21 E-mail: argerie.tsimicalis@mcgill.ca  
22 Telephone: 514-398-8142

23

24 **Acknowledgements**

25 Several Shriners clinicians and caregiving stakeholders also provided invaluable  
26 feedback on the interview guides (Johanne Brunelle, RN; Sylvie-Anne Plourde, RN;  
27 Catherine Dubé, BSW; Trudy Wong, MSW; Mary Curtin, BA; Maria Caruso, BA,  
28 DipEd, CertSpEd; Marie Donato, BA, DipEd, CertEd; and Angela Gugliotti, BA).  
29 Finally, this study could not have been conducted without the caregiver participants  
30 who took time to share their knowledge and expertise.

31

32 **Conflict of Interest Statement**

33 The authors report no conflicts of interest.

34

35

36 **Funding**

37 This work was generously supported by the Tunis Shriners, the Newton Foundation,  
38 Scotiabank®, and the McGill University Ingram School of Nursing Summer Bursary  
39 Programs of 2018 and 2019. Dr. Tsimicalis is supported by a Chercheur-Boursier Junior  
40 1 from the Fonds de Recherche Québec-Santé (Quebec Medical Research Council). Ms.  
41 Castro is supported by a Fonds de Recherche Québec-Santé Formation de Doctorat  
42 (doctoral research award).

43

1 **Title**

2 The day-to-day experiences of caring for children with Osteogenesis Imperfecta: A  
3 qualitative descriptive study

4 **Abstract**

5 **Aims and objectives:** This study aimed to explore the day-to-day experiences of  
6 caregivers who are caring for children with Osteogenesis Imperfecta (OI).

7 **Background:** OI is a rare genetic condition known to cause bone fragility. Family  
8 caregivers, such as parents, of children with OI play an important role in helping these  
9 children live well at home.

10 **Design:** The design was qualitative description.

11 **Methods:** A qualitative descriptive study was conducted which adheres to the  
12 COREQ guidelines. Adult caregivers (n=18) of children with OI were recruited at  
13 a children's hospital in Montréal, Canada to participate in individual interviews.  
14 The interviews were transcribed verbatim and inductively thematically analysed.

15 **Results:** The following caregiving themes were identified in these interviews:  
16 regular day-to-day caregiving activities, including morning routines, evening  
17 routines, and the facilitation of their child's mobilization; periods that made the  
18 caregiving routine more challenging, such as fractures, surgeries, and pain; and  
19 the long-term strategies caregivers developed to support day-to-day care, such as  
20 managing the environment, accessing medical and school resources, and  
21 coordinating care and respite.

22 **Conclusions:** The results showcase what being a caregiver for a child with OI  
23 involves on a day-to-day basis.

- 1 **Relevance to clinical practice:** The recommendations include suggestions for future
- 2 clinical, policy, and research endeavours to develop better policies and
- 3 interventions to support the unique needs of family caregivers of children with OI.
- 4 These recommendations may be relevant to other clinicians and policymakers
- 5 working with families living with rare and chronic physical conditions.
- 6 **Keywords:** care needs, carers, child nursing, chronic illness, community care,
- 7 parenting, paediatrics, orthopaedics

1 **Introduction**

2 Osteogenesis Imperfecta (OI) is a rare genetic condition affecting 1 in 10 000  
3 births that is predominantly caused by an alteration in the genes responsible for collagen  
4 production (Marini et al., 2017; Trejo & Rauch, 2016). It is characterized by increased  
5 bone fragility, but this chronic condition can also cause teeth and soft tissue  
6 abnormalities, discoloured sclera, hearing loss, shortened stature, and skeletal  
7 deformities (Marini et al., 2017; Trejo & Rauch, 2016). OI Types I – IV are the original  
8 classifications of OI, although other types have been added since (Trejo & Rauch,  
9 2016). OI Type I is the most common form of the condition and has the mildest disease  
10 severity, with fewer fractures expected over the life course. OI Type II is lethal in the  
11 neonatal period. OI Type III is the most severe form of OI that is compatible with a  
12 longer lifespan. OI Type IV is of moderate disease severity. OI Types V, VI, and VII  
13 are newer classifications that present with different tissue and bone mineralization  
14 phenotypes, and have mild to moderate severity (Marini et al., 2017; Trejo & Rauch,  
15 2016). At present, there is no cure for OI. Bisphosphonate therapy is used to improve  
16 bone mass density (Trejo & Rauch, 2016). Surgery, physical therapy, and occupational  
17 therapy are other common treatment modalities (Dogba et al., 2013; Marini et al.,  
18 2017).

19 Family caregivers, such as parents, play a critical role in helping children with  
20 unique needs to thrive at home in the community (McCann, Bull, & Winzenberg, 2012).  
21 It is important to understand the day-to-day experiences of caregivers of children with  
22 unique needs - such as the unique care needs of children who have fragile bones - in  
23 order to develop policies and services that are adapted to their specialized daily care  
24 needs (McCann et al., 2012; Pearlin, Mullan, Semple, & Skaff, 1990). Thus, the aim of  
25 this research was to better understand the day-to-day experiences of caring for children

1 with OI. These results have important implications for clinicians and policymakers who  
2 work with families living with OI or other rare, chronic conditions.

### 3 **Background**

4 When a child has OI, a parent usually adopts the role of primary caregiver to  
5 assist with their child's everyday needs (Vanz, Felix, da Rocha, & Schwartz, 2015).  
6 Challenges unique to OI caregiving include the constant risk of fractures, over-  
7 protectionism, social isolation, home adaptations, and suspicions of child abuse  
8 (Arabaci et al., 2015; Bernehall & Brodin, 2002; De Carmoy, 2004; Dogba, Rauch, Tre,  
9 Glorieux, & Bedos, 2014). OI parents have reported lower scores in the environmental  
10 quality of life domain (i.e., the domain which includes factors such as environmental  
11 safety and access to social supports) compared to the general population of parents  
12 (Szczepaniak-Kubat, Kurnatowska, Jakubowska-Pietkiewicz, & Chlebna-Sokol, 2012;  
13 Vanz et al., 2015). The OI caregiver experience may generate positive experiences for  
14 families, such as the development of an optimistic mindset and being inspired by their  
15 children's resilience (Dogba et al., 2013). However, for many families, a child's OI  
16 diagnosis appears to be a life-altering event requiring various and ongoing parental  
17 adjustments (Arabaci et al., 2015; Dogba et al., 2013; Murphy, Christian, Caplin, &  
18 Young, 2007).

19 It is important to understand the day-to-day experiences of caregivers of children  
20 with unique needs like OI in order to develop services that are adapted to the specialized  
21 daily care needs of these families (McCann et al., 2012; Pearlin et al., 1990). While  
22 several studies on the OI family experience have included some analysis of the day-to-  
23 day lives of OI caregivers (Bernehall & Brodin, 2002; De Carmoy, 2004; Deatrick,  
24 Knafl, & Walsh, 1988; Dogba et al., 2013; Dogba et al., 2014; Hill, Baird, & Walters,

1 2014; Santos, Pires, Soares, & Barros, 2017), none of these studies focused primarily on  
2 the minutiae and routines of daily care.

3 Therefore, the purpose of this study was to explore the day-to-day experiences  
4 of caregivers who are caring for children with OI. We interviewed 18 adult caregivers  
5 of children with OI about their day-to-day OI caregiving experiences. They described  
6 their routine activities of day-to-day caregiving, their experiences during challenging  
7 periods of caregiving, and the long-term strategies they developed to support their  
8 child's day-to-day care needs. These findings have important implications for clinical  
9 practice, policy, and research.

## 10 **Methods**

### 11 **Design**

12 The study methodology was qualitative description (Sandelowski, 2000). This  
13 study was part of a larger one which sought to explore the views of OI caregivers on  
14 using Internet-based technologies to support their caregiving needs (\*\*manuscript  
15 available as a preprint. Will add citation after double-blind peer review\*\*).

### 16 **Sample and Recruitment**

17 A purposive sampling strategy was used to recruit family caregivers of children who  
18 were being treated for different types of OI at the study site. Inclusion criteria included  
19 all family caregivers of patients being treated for OI at the hospital site, who considered  
20 themselves to be the primary caregivers of the child, and who spoke either English or  
21 French. A non-authoritative member of the team approached clinicians who had  
22 appointments with OI patients to mediate an introduction to the study. If  
23 caregivers expressed an interest in learning more about the study, then a member

1 of the research team described the study and informed the caregiver of the  
2 potential consequences of participating. If the caregiver provided their written  
3 consent to participate, then an interview was scheduled at the caregiver's  
4 convenience.

### 5 **Data Collection**

6 [\*\*\*Note to editor and reviewers: To keep this section as anonymous as possible for  
7 double-blind review, we have replaced the authors' initials with "\*\*\*". Once the paper is  
8 reviewed, we will replace these \*\* with the specific contributing authors' initials.]

9 A demographic data survey was filled out by each participant. Individual semi-  
10 structured interviews were subsequently conducted by a member of the research team,  
11 in either English or French depending on the caregiver's preference. The interviews  
12 were conducted by either author \*\* or \*\*, at the study site or by telephone or  
13 videoconferencing. Key questions relevant to day-to-day care from the larger study's  
14 interview guide are listed in Table 1. The interview guide was reviewed by key  
15 informant clinicians prior to the participant interviews. Interviews were audiotaped,  
16 field notes were recorded during and after the interviews, and a reflective journal was  
17 kept by author \*\*.

### 18 **Analysis**

19 The surveys were analyzed using descriptive statistics. The transcribed data and  
20 field notes were uploaded into Microsoft Excel, where they were first inductively open-  
21 coded by three of the authors (\*\*, \*\*, and \*\*), and then further analyzed primarily by  
22 \*\* with inter-coder checks by \*\* using (Braun & Clarke, 2006)'s six steps for thematic  
23 analysis. Interviews conducted in French were first open-coded into English by authors  
24 \*\* and \*\* who are fluent in both English and French. In frequent meetings with the

1 principal investigator (\*\*), the research team discussed the ongoing development  
2 of the codebook by \*\* and established the final themes. These codebooks and  
3 meeting notes were recorded in a research journal, as were the ongoing research  
4 reflections of \*\*. The carefully anonymized research journal and the codebook may  
5 be made available for audit upon request.

## 6 **Ethical Considerations**

7 Ethical approval was received from the university's Institutional Review Board  
8 and the study site prior to recruitment. The university's ethical review process conforms  
9 to the Canadian Tri-Council Policy Statement on the Ethical Conduct for Research  
10 Involving Humans. All participants provided written informed consent to participate in  
11 the study, with the understanding that they would not be identifiable in any  
12 presentations of the research. All participant data were anonymized.

## 13 **Rigour**

14 Qualitative rigour was established using (Lincoln & Guba, 1985)'s four  
15 criteria of credibility, dependability, confirmability, and transferability. Credibility  
16 was enhanced by the use of reflexive journaling, the audio-taping of interviews,  
17 and the research team's frequent meetings for peer debriefing (Polit & Beck,  
18 2012). The dependability of this research was enhanced by careful documentation  
19 of our team discussions and decisions in a research journal, and making the  
20 anonymized research journal, and codebook available for audit upon request (Polit  
21 & Beck, 2012). The confirmability of this research is supported by our carefully  
22 documented decision trail in our research journal, our regular team debriefings,  
23 and our audit trail (Polit & Beck, 2012). The transferability of this research is  
24 supported by the team development of our codebook, inter-coder checks, and our



1 use of thick descriptions and quotes (Polit & Beck, 2012). The Consolidated Criteria  
2 for Reporting Qualitative Research (COREQ) guided our data collection and analysis  
3 and later reporting of the research (Supplementary File 1) (Tong, Sainsbury, & Craig,  
4 2007).

## 5 **Results**

### 6 **Demographic Data**

7 Nineteen caregivers were approached in-person, and all verbally agreed to  
8 participate. However, one caregiver was lost to follow-up. Eighteen adult caregivers  
9 from 14 families were individually interviewed. Thirteen caregivers were women and  
10 five were men. Three families resided outside of Canada. Four of the 14 families shared  
11 that they had family incomes of less than \$50 000 per year, and all 18 caregivers had  
12 received at least some post-secondary education. Interviews ranged from 15 minutes  
13 to 1.5 hours in length. They resulted in 13.05 hours of audio-recordings and over 8000  
14 spreadsheet lines of coded transcript. Their children's OI types included I, III, IV, and  
15 VI; the more severe forms of types III and IV were the most common. Some children  
16 with OI required no mobilizing assistance, while others used a wheelchair full-time.  
17 Further demographic data are listed in Table 2.

### 18 **Caregiving Themes**

19 We inductively derived the following themes relating to the day-to-day  
20 experiences of OI caregiving: regular day-to-day caregiving activities, challenging  
21 periods, and the long-term strategies caregivers developed to support day-to-day care.

1 ***Regular day-to-day caregiving activities***

2 OI caregivers were asked to share what a regular OI caregiving day looked like.

3 Key components of these day-to-day activities included following morning and evening  
4 routines to assist with their child's activities of daily living (ADLs), and facilitating  
5 mobilization.

6 ***Morning and evening routines.*** Mornings were particularly busy for caregivers,  
7 when many ADLs tended to occur all at once, and all tasks needed to be completed  
8 before school and paid work began. Mornings consisted of waking everyone up, making  
9 lunches, helping children get dressed, and using the bathroom. Some children needed  
10 assistance in dressing with their leg braces or corsets. Children needing the most  
11 assistance with ADLs were younger children and those with more severe types of OI.  
12 Chronic pain management was also a part of the morning routine for at least two  
13 families. Most families chose to drive their children to school, although one child used  
14 an adapted bus. One mother said her son would walk to school if it was nice outside, but  
15 if his backpack was heavy or the sidewalk was icy, she would drive him to school,  
16 instead. Another family explained that wheelchair ramps were often too icy or snowy  
17 during winter to be useful. Other caregivers shared that they did not use the adapted  
18 school bus because it arrived too early to be useful for them in their busy mornings. So,  
19 sometimes, services meant to be accessible were not truly accessible for these families.

20 Evenings were described as being more relaxed than mornings. In the evenings,  
21 caregivers made dinner, had their children complete chores as they were able to, played  
22 games with their children, talked about school, and listened to audiobooks as a family.  
23 Caregivers took their children to specialized and frequent physical therapy and  
24 occupational therapy appointments. A few parents discussed taking time to cuddle with  
25 their younger children. School-aged children were expected to use some of the evening

1 time for school work; a few parents noted their children’s academic and social  
2 successes:

3 I’m proud of my kids. [Child with OI] does super well at school and has a nice  
4 personality.  
5 (Mother, Family 5, Type III)

6  
7 Some children engaged in adapted sports, various artistic classes, and other low-impact  
8 activities. Older children with fewer accessibility challenges would go outside to play  
9 with friends on their own.

10 ***Facilitating mobilization.*** Mobilizing or transferring their children during these  
11 activities was conducted carefully. Some school-aged children would crawl or slide  
12 around on their buttocks, reserving walkers and wheelchairs for more fatiguing times.  
13 One child with a milder form of OI needed her family’s regular encouragement to move  
14 on her own, particularly up stairs where she had more difficulties. Transfers presented  
15 with some of the greatest difficulties for families. Many of the children needed at least  
16 some assistance in transferring to and from the bed, car, wheelchair, or toilet. One legal  
17 guardian shared that “just moving him from point a to point b is most challenging”  
18 (Guardian [Mother], Family 8, Type VI). While these caregivers typically lifted their  
19 school-aged child into the truck, it was becoming difficult to lift him as he was getting  
20 older and heavier. For families that had children with more severe types of OI, all of  
21 these activities facilitating mobilization needed to be accomplished without causing  
22 further pain or fractures. In contrast, families with Type I OI generally reported not  
23 noticing any significant differences in the day-to-day requirements of caring for their  
24 child living with OI, compared to caring for a child without OI.

1 ***Challenging periods***

2 OI caregivers were constantly aware that the regular daily routines they had  
3 established could be disrupted by fractures, surgeries, and pain. These challenging  
4 periods increased the care management needed.

5 ***Fractures.*** The initial stress of bone breaks came from their unexpectedness.  
6 The first fractures in their child's life caused some caregivers to panic, although  
7 caregivers said they learned to adapt. One mother shared that a challenging day for her  
8 was when she was called from her office due to a fracture at school:

9 The challenging time is when I'm called from the office that there's a fracture.  
10 Sometimes she fractures in school, sometimes she fractures when she comes  
11 back. And I will have to quickly rush home to go see the severity of the fracture,  
12 whether it's just a crack, or it's a real fracture where we have to go to the  
13 hospital. So basically, that's when it becomes challenging.  
14 (Mother, Family 6, Type III)  
15

16 She explained that she did not like going to the hospital because she said the hospitals in  
17 her country did not understand OI; she felt stigmatized in hospitals.

18 With more severe forms of OI, a fracture could happen practically  
19 spontaneously. One caregiver explained how easily femur fractures occurred:

20 He was jumping on my bed. And, you know, like a normal four-year-old would  
21 do. We were doing laundry, he was jumping on the bed, and with that, we heard  
22 a *snap*. And he is *screaming*, leg bevelled out, and we're like "well, that's  
23 strange." And then we went to the hospital, and they're like, "okay, it's a femur  
24 fracture." And that happened about two other times after that. Then they're like,  
25 "okay, we're going to test him [for OI]".  
26 (Guardian [Older Sister], Family 8, Type VI)  
27

28 Another caregiver shared that whenever her child fractured, she immediately assessed  
29 the fracture and administered appropriate medications. Then, her child relaxed for the  
30 rest of day. Other parents shared that in the case of severe fractures, they would go to  
31 the hospital and wait for treatment and recovery.

1           **Challenges of surgery.** Surgeries presented unique difficulties for families.  
2 Hospital boredom was often a challenge for parents, especially if they had to fly to  
3 Montréal for surgery and wait several days or weeks before returning home. A few  
4 caregivers discussed how challenging planning their lives around surgeries could be –  
5 especially when, after arranging their work and family schedules around a specific date,  
6 the surgery date was sometimes changed by the hospital.

7           Care coordination for treatment created additional challenges for the three  
8 international families interviewed. Caregivers shared that accessing OI treatment in  
9 their own countries could be difficult, so a few of them received pro-bono treatment  
10 supplies through the international OI community. For a mother, whose daughter needed  
11 a few surgeries over several months, finding a Montreal sponsor to live with (as may  
12 sometimes be required) was a significant care coordination challenge for her. She said  
13 she had to somehow find a sponsor to live with for several months, in a city far from her  
14 own, while also arranging care with her husband and their other children who would  
15 stay behind in her home country. She explained:

16           So I leave [the other children] with my husband when I came to the [Montreal  
17 OI treatment centre] in August . . . I think from the way it is, [the treatments]  
18 will end by December . . . You understand, I have my kids calling me, ‘Mommy,  
19 when are you coming back?’ . . . it’s a very long time.  
20 (Mother, Family 12, Type III)  
21

22           **Caregiving after a fracture or surgery.** Caregiving became more difficult after a  
23 fracture or a surgery, with the child’s limb or limbs immobilized and unable to bear any  
24 weight. Immobility required more assistance with ADLs and made transfers more  
25 challenging. Leg fractures were particularly problematic because the child was then  
26 non-weight-bearing on that limb, making transfers to and from places - such as the

1 bathtub, toilet, or car - heavy and complex for the caregiver. When children fractured,  
2 time for self-care and outside excursions could become more difficult:

3 Um, especially when they're fractured, it's not as easy to get out. You don't  
4 want to be transferring them when they're in pain, getting them into their car-  
5 seat. And when you're the only person at home 'cause your husband's working,  
6 if you need to go to the grocery store, then you have to take them with you. So  
7 sometimes you're not necessarily getting yourself ready in the morning because  
8 you're just trying to get them into a position where they can get out of the house  
9 at some point or for an appointment.  
10 (Mother, Family 13, Type III)  
11

12 After surgery, the family's routine would change. One mother explained that  
13 after a fracture, her child would sleep in the same bedroom as her, receive more pain  
14 medication, and stay home for a few days post-surgery. Fractures and surgeries created  
15 stress for caregivers during ADLs, as they were worried about any jostling during care  
16 work that could harm the child. As a result, caregivers tended to minimize activity and  
17 stay at home during these periods.

18 **Pain.** For some families of children with OI, life could revolve around pain  
19 management. One mother explained that when her school-aged son was in pain, he  
20 would call for "Mommy!" a lot more frequently (Mother, Family 5, Type III). Another  
21 mother shared that her child was often in physical pain, particularly experiencing  
22 regular headaches and back pain. As a caregiver, this mother had to evaluate the pain  
23 level two to three times per day and administer pain medications as needed. Two  
24 parents also shared that their children experienced regular back pain in spite of their  
25 fractures being healed. Periods of increased pain, then, created frequent disruptions to  
26 OI caregivers' daily routines.

### 27 ***Long-term strategies for supporting day-to-day care***

28 A comment by one mother embodied the management of day-to-day care:

1 Dealing with OI is most likely all the time, how are we going to do things? You  
2 know? How are we going to surpass this limitation?  
3 (Mother, Family 5, Type III)

4  
5 Caregivers became experts in caring for their children's unique daily health and care  
6 needs. Caregivers developed strategies which would make future day-to-day caregiving  
7 work easier. They learned to manage the environment, access medical and school  
8 resources, and coordinate care and respite.

9 ***Managing the environment.*** Generally, caregivers tried to balance their desire  
10 to protect their child from harm, while also minimizing the limits placed on their child  
11 day-to-day. Managing care for caregivers often meant "managing the environment more  
12 than the kid":

13 We make sure that there is no chair or anything that could actually fall on her.  
14 the remote for the TV are never actually accessible if she's standing from the  
15 couch, because . . . it's heavy. It's an old remote. We do play stuff differently,  
16 without saying "no you can't" or "don't do that" or "don't touch that". It's really  
17 just managing the environment more than the kid . . . [The] environment is our  
18 responsibility.  
19 (Mother, Family 1, Type IV)

20  
21 Managing the environment included adapting their housing to be safer (for instance, by  
22 installing extra-cushioned carpeting), coordinating with schools to manage the care of  
23 their child safely, and searching for low-impact activities that their children could  
24 participate in. With these environmental management strategies, future day-to-day care  
25 work was made easier, because their homes and schools were more prepared for a child  
26 with brittle bones to thrive in, and their children had low-impact activities and skills that  
27 they could develop.

28 ***Accessing medical and school supports.*** Caregivers described spending a lot of  
29 their caregiving time researching information and resources about OI, particularly for  
30 accessing medical and school supports. Once specialized medical and school supports  
31 were established, caregivers felt more at ease in their day-to-day care work.

1           *Accessing medical support.* For several caregivers, just because they had a  
2 diagnosis of OI did not mean they had adequate medical support and information for  
3 ongoing care. Caregivers shared that it was only once they found the Montreal OI  
4 treatment centre that they felt supported in their child's medical care. Healthcare  
5 providers outside of the treatment centre – such as emergency staff and general  
6 pediatricians at other hospitals – did not always know how to treat OI. Some parents  
7 shared that when other health professionals tried to treat their children, the clinicians  
8 fractured their child's other bones in the process. One Quebecoise mother believed not  
9 enough information was initially shared with her about her rights and available  
10 resources. She explained that when her daughter was a pre-schooler, the two of them  
11 spent an entire year avoiding all outings because they did not know how to mobilize her  
12 growing daughter beyond using a baby stroller. They were socially isolated and home-  
13 bound until she was told that her daughter had the right to access a properly fitted  
14 wheelchair.

15           Access to the greater OI community was an important resource for finding long-  
16 term medical supports. Several caregivers spent a lot of time seeking resources through  
17 their OI network. For instance, a few caregivers managed to receive regular OI  
18 treatment materials in their own country via the international OI community when they  
19 could not access those materials at home. Once caregivers managed to access long-term  
20 OI medical supports, either with an established OI social network or – ideally – with a  
21 specialized OI treatment centre nearby, caregivers felt more supported in their day-to-  
22 day caregiving activities, because they had access to people who were knowledgeable  
23 about OI; they were no longer caregiving alone.

24           *Accessing school supports.* For some families, finding daycare centres and  
25 schools that were comfortable with a child with OI was a challenging task. Once they



1 found an accommodating school, several families described making plans to go into the  
2 school every year to share with the new educators how to care for a child with OI.

3 These new school caregivers had to be taught:

4           How do we immobilize a fracture, how do we give the medication, and how do  
5           we put him on the toilet seat . . . how do we take care of him?  
6           (Mother, Family 5, Type III)

7  
8 Most children were attending public schools. However, they still required access to a  
9 school aide person who could help them in the washroom, carry books, push the  
10 wheelchair, or write for them, as needed.

11           A few caregivers were using more specialized school services. One child moved  
12 to Montreal with her mother to attend a school for children with special needs, while the  
13 child's father and siblings remained in their hometown several hours away. Another  
14 family was choosing to homeschool their child instead of sending him to a public  
15 school, because they wanted to be sure he was mobilizing enough during the day. They  
16 feared that a public school would be too scared of him breaking a bone that they would  
17 not allow him to mobilize enough.

18           Other routine medical and school resource challenges included the availability  
19 of services, language barriers, and Internet access. Even among financially secure  
20 families, some families could not find appropriate daycare centres for their child with  
21 more severe OI. One mother explained that there was a long waiting list for daycare for  
22 children with special needs. Language barriers could also affect resource accessibility.  
23 Some families noted that the lack of OI resources available in languages outside of  
24 English (such as French) were limited. Access to the greater OI community through the  
25 Internet could also determine whether families managed to find a specialized OI  
26 treatment centre and other OI resources.

1            *Coordinating care and accessing respite.* Caregivers described many care  
2 coordination tasks related to their child’s OI. These included the following tasks:  
3 arranging and attending numerous medical appointments and treatments, remembering  
4 to bring the wheelchair or walker whenever they went out, managing respite care, being  
5 flexible with schedules in case of surgery or fractures, keeping track of medical records,  
6 seeking out community and health resources, and filling out medical paperwork and  
7 reimbursement forms. All of these activities required significant time and coordination  
8 skills on the part of caregivers, which frustrated some of the caregivers. However, once  
9 these coordination activities were accomplished, they made caregivers’ future day-to-  
10 day care work easier. For instance, by carefully organizing and keeping track of their  
11 child’s medical records, and by being flexible with their schedules, caregivers were able  
12 to quickly adapt if medical emergencies arose.

13            Most caregivers expressed chronic challenges with accessing respite care,  
14 explaining that they did not trust others to care for their child with OI. One mother said  
15 that learning to trust others is “sort of an issue” (Mother, Family 1, Type IV). Several  
16 caregivers shared that they were not comfortable hiring a babysitter for their child with  
17 OI, or even leaving their child with friends or family. Still, some families had  
18 grandparents and friends who caregivers were teaching how to care for their child in  
19 order to provide these caregivers with parenting breaks. Two mothers suggested that  
20 more trusted respite care opportunities, such as kids’ events or summer camps organized  
21 by OI treatment centres, would be very helpful. If caregivers had easy access to people  
22 they trusted to care for their child, day-to-day care was made easier because caregivers  
23 had a reliable back-up caregiver. However, most caregivers did not have anyone they  
24 fully trusted to provide this care.

1 **Discussion**

2 This study offers a comprehensive overview of the day-to-day experiences of  
3 caring for a child with brittle bones, the challenging periods that can disrupt day-to-day  
4 routines, and the long-term strategies they developed to make day-to-day OI caregiving  
5 easier. Understanding the unique daily experiences of caregivers of children with rare  
6 and chronic conditions like OI is important knowledge for helping clinicians and policy  
7 makers to build better supports for these caregivers. Such supports could improve  
8 caregivers' daily experiences of caregiving, and therefore improve their child's care  
9 (Luijkx, Putten, & Vlaskamp, 2017; McCann et al., 2012).

10 The limited existing OI literature suggests that OI parents often have more tasks  
11 to accomplish in one day than most parents do. Even on typical days without fractures  
12 or surgery, a key difference is the child's independence in completing ADLs. For more  
13 severe types of OI, in particular, the multiple physical transfers needed for toileting,  
14 clothing, and transport increased the energy and amount of time it took to accomplish  
15 these ADLs (Deatrick et al., 1988; Dogba et al., 2014). Facilitating mobilization and  
16 transportation for those living with rare and physical conditions is a common but  
17 challenging caregiving task (Andrews, 2013). However, in addition to managing the  
18 task of mobilization, OI caregivers of children with more severe types of OI also  
19 experience the unique and constant fear of fracturing their child while completing  
20 transfers and other day-to-day tasks (Brodin, 1993). Our study corroborates these  
21 reports of the experiences of OI day-to-day caregiving. In our study, caregivers shared  
22 that mornings were the most intense period of the day due to the number of ADLs  
23 needing attendance by a strict deadline (i.e., when school and caregivers' paid work  
24 began). Furthermore, and in accordance with the research literature, facilitating their

1 child's mobilization and transportation was one of the most significant components of  
2 caregivers' day-to-day routines.

3 For OI caregivers in our study, periods which presented particular challenges to  
4 OI caregivers' day-to-day routines were periods with fractures, surgeries, and pain.  
5 These time periods were also described as some of the most challenging aspects of OI  
6 care in other studies of OI families (De Carmoy, 2004; Deatrick et al., 1988; Dogba et  
7 al., 2013; Santos et al., 2017). However, while the caregivers in our study  
8 acknowledged facing challenges and at times feeling overwhelmed, most appeared to be  
9 successfully managing as parents and caregivers. Caregivers explained that once they  
10 found the study site (a specialized OI treatment centre), they felt more supported as  
11 caregivers. These results correspond with the results of another study which was also  
12 conducted at our study site (Dogba et al., 2013). However, these results contrast with  
13 other studies on OI caregiving which described caregivers feeling burned out, hopeless,  
14 and overwhelmed by the unique challenges of caring for children with brittle bones  
15 (Arabaci et al., 2015; Bozkurt et al., 2014; De Carmoy, 2004). These latter studies do  
16 not appear to have been conducted in settings with access to specialized OI services.  
17 This contrast may speak to the psychosocial benefits that access to specialized OI  
18 medical resources can have on OI families.

19 The literature suggests that trying to manage the environment, access medical  
20 and school supports, coordinate care, and find trusted respite services are all common  
21 care management strategies of chronic caregivers (Pelentsov, Laws, & Esterman, 2015;  
22 Samia, O'Sullivan, Fallon, Aboueissa, & Hepburn, 2018). Other researchers have noted  
23 that OI caregivers spend significant amounts of time trying to gain reliable access to OI  
24 medical and school supports, social supports, and respite care (Arabaci et al., 2015;

1 Bernehall & Brodin, 2002). These activities for facilitating day-to-day OI care over the  
2 long-term were described by caregivers in our study, as well.

### 3 **Strengths and Limitations**

4       The methodological strengths of this study included providing rich descriptions  
5 of the study setting, participant demographics, and methods for transferability purposes.  
6 The results help address the paucity of literature available on OI caregiving, as well as  
7 on the supportive care needs of parents of children with a rare condition (Pelentsov et  
8 al., 2015). While corroborating much of the current OI caregiving literature, our study  
9 also adds to our knowledge of OI caregiving by providing more detailed data on what  
10 day-to-day OI caregiving looks like. This study appears to be the first to focus on the  
11 day-to-day tasks and routines of OI caregiving. Understanding the daily life of family  
12 caregivers is important because the differences required in care for caregivers of  
13 children with unique health needs can cause significant caregiver distress (Pelentsov et  
14 al., 2015). Furthermore, understanding their unique needs can support the development  
15 of evidence-based health and social supports for these families (Collins et al., 2016;  
16 Luijkx et al., 2017).

17       This study has several limitations. With the time and resources available for the  
18 study, only 18 caregivers from 14 families were interviewed. The sample could have  
19 benefited from more socioeconomic caregiver diversity. All caregivers had some post-  
20 secondary education, and a majority of the families (n=7) reported incomes of more  
21 than \$80,000 per year. Only one caregiver was under the age of thirty, and all but two  
22 parents said they had another adult helping them at home, such as a spouse, adult child,  
23 or grandparent. The needs of younger and single-parent OI caregivers should be  
24 researched further. Finally, all of these families had access to the study site, which  
25 specializes in OI treatment. Researchers should explore the day-to-day experiences and

1 routines of families who have more limited educational and financial resources, and  
2 who do not have access to a specialized centre for OI. Since the majority of the  
3 caregivers in this study had school-aged children (n=11 of the 17 children), more  
4 research should be conducted on the caregiving experiences of those caring for younger  
5 children, as well as those caring for teenagers. While these data revealed the day-to-day  
6 caregiving routines of regular days and challenging days, we did not fully explore what  
7 an excellent or optimal day looks like for caregivers of children with OI. Further  
8 qualitative and quantitative research should be conducted to build on this study's work  
9 to better understand the diverse range of OI caregivers' day-to-day caregiving  
10 experiences.

### 11 **Conclusion**

12 In conclusion, the rich data collected from these interviews help elucidate the  
13 day-to-day activities and challenges faced by OI caregivers. The results complement  
14 previous research in the caregiving and OI research fields, while also adding a deeper  
15 understanding of the day-to-day experiences of OI caregivers. This knowledge may help  
16 clinicians and healthcare systems offer improved services to these families. It also  
17 provides further direction for future research initiatives to help promote the health and  
18 well-being of OI caregivers.

### 19 **Relevance to Clinical Practice**

20 This study has implications for nurses and other pediatric clinicians. Finding  
21 information about OI, accessing treatment (especially for families who lived far away  
22 from the treatment center), finding knowledgeable local healthcare providers, and  
23 coordinating available community and school supports, were all challenges faced by the  
24 caregivers in our study. Clinicians should share the long-term strategies that these

1 expert OI caregivers have developed, with newly-diagnosed families with OI. Doing so  
2 may help make the initial diagnosis less traumatic, giving families the practical  
3 information they need to care for their child at home in the community (Dogba et al.,  
4 2013). They should also work to develop clinical home-care tools to provide long-term  
5 supports for OI families. For instance, the study site has developed a splint kit that helps  
6 caregivers splint their children's fractures at home; such a kit is particularly valuable  
7 when families do not have knowledgeable healthcare professionals nearby to assist them  
8 (\*\*\*)Will include citation once double-blind peer review is finished(\*\*\*). Similar  
9 resources could further support caregivers in helping their children to thrive with OI.

10 OI medical services should be more accessible. For instance, OI specialists  
11 should be easier to find. Nurses and clinical researchers should ensure that they are  
12 sharing accessible online resources for families coping with rare conditions like OI. For  
13 families coping with rare and relatively unknown conditions, the Internet may be one of  
14 their only sources of information (DeHoff, Staten, Rodgers, & Denne, 2016; Knapp,  
15 Madden, Wang, Sloyer, & Shenkman, 2011). OI caregivers shared that their day-to-day  
16 caregiving experiences were improved once they had access to the study site and  
17 specialized OI care. However, a few caregivers also shared that the time taken to travel  
18 to appointments, to complete surgeries, and to fill out reimbursement forms was too  
19 time-consuming and complicated. Institutions and policymakers should work to ensure  
20 that all medical services are accessible, efficient, and easy to navigate, with as little  
21 family separation as possible.

22 Policymakers should focus on building supports for trusted respite care and  
23 other high-quality services. Policymakers should work to build more comprehensive  
24 and qualified respite support services for caregivers of care recipients with complex  
25 needs. A few caregivers in this study suggested that child care services provided by

1 specialized treatment centres, such as special drop off days or summer camps, would be  
2 appreciated. Another option might be to develop OI caregiving teaching materials to  
3 help caregivers teach their friends and extended family on how to care for their child  
4 day-to-day. A few of the caregivers mentioned that even when they had community  
5 supports like adapted buses and wheelchair ramps, those services often did not meet  
6 their unique caregiving needs, so they did not use them. Policymakers should work to  
7 ensure that such services are adapted and truly accessible to families with complex care  
8 needs, so that these families can learn to trust and rely on the services developed for  
9 them.

10 **What does this paper contribute to the wider global clinical community?**

- 11 • These results showcase what being a caregiver for a child with a rare and  
12 chronic physical condition - Osteogenesis Imperfecta - involves on a day-to-day  
13 basis.
- 14 • Caregivers of children with rare and chronic physical conditions like OI have  
15 unique needs, such as physical mobilization support needs, as well as needing  
16 better access to medical information, accessible schools, and appropriate care  
17 services.
- 18 • Nurses, clinicians, and policymakers who work with families coping with OI  
19 and similar conditions should develop interventions and policies that support the  
20 unique needs of these families; these interventions and policies should facilitate  
21 the long-term strategies that caregivers have already developed to support their  
22 day-to-day caregiving activities.

23

24





1

## References

- 2 Andrews, M. (2013). Measuring exertion during caregiving of children and young  
3 adults with cerebral palsy who require assistance for mobility and self-care.  
4 *Phys Occup Ther Pediatr*, 33(3), 300.
- 5 Arabaci, L. B., Bozkurt, S., Vara, S., Ozen, S., Darcan, S., & Simsek, D. G. (2015).  
6 Difficulties experienced by caregivers of patients diagnosed with osteogenesis  
7 imperfecta (OI): Example of a hospital. *J Pak Med Assoc*, 65(7), 764-770.
- 8 Bernehall, C. I., & Brodin, J. (2002). What families with children with brittle bones  
9 want to tell. *Child: Care, Health and Development*, 28(4), 309-315. Retrieved  
10 from  
11 [http://ovidsp.ovid.com/ovidweb.cgi?T=JS&PAGE=reference&D=emed8&NEW](http://ovidsp.ovid.com/ovidweb.cgi?T=JS&PAGE=reference&D=emed8&NEWS=N&AN=34846908)  
12 [S=N&AN=34846908](http://onlineibrary.wiley.com/doi/abs/10.1046/j.1365-2214.2002.00282.x)  
13 <https://onlineibrary.wiley.com/doi/abs/10.1046/j.1365-2214.2002.00282.x>
- 14 Bozkurt, S., Baysan Arabaci, L., Vara, S., Ozen, S., Goksen, D., & Darcan, S. (2014).  
15 The impact of psycho-educational training on the psychosocial adjustment of  
16 caregivers of osteogenesis imperfecta patients. *J Clin Res Pediatr Endocrinol*,  
17 6(2), 84-92. Retrieved from <https://www.ncbi.nlm.nih.gov/pubmed/24932601>
- 18 Braun, V., & Clarke, V. (2006). Using thematic analysis in psychology. *Qual Res*  
19 *Psychol*, 3(2), 77-101. doi:doi: 10.1191/1478088706qp063oa
- 20 Brodin, J. (1993). Children and adolescents with brittle bones — psycho-social aspects.  
21 *Child: Care Health Dev*, 19(5), 341-347. doi:10.1111/j.1365-  
22 2214.1993.tb00738.x
- 23 Collins, A., Hennessy-Anderson, N., Hosking, S., Hynson, J., Remedios, C., & Thomas,  
24 K. (2016). Lived experiences of parents caring for a child with a life-limiting  
25 condition in Australia: A qualitative study. *Palliat Med*, 30(10), 950-959.
- 26 De Carmoy, R. J. (2004). Children and adolescents with brittle bones: How can they  
27 overcome their disability? *Neuropsychiatrie de l'Enfance et de l'Adolescence*,  
28 52(6), 422-429. doi:<http://dx.doi.org/10.1016/j.neurenf.2004.07.004>
- 29 Deatrck, J. A., Knafl, K. A., & Walsh, M. (1988). The process of parenting a child with  
30 a disability: normalization through accommodations. *J Adv Nurs*, 13(1), 15-21.
- 31 DeHoff, B. A., Staten, L. K., Rodgers, R. C., & Denne, S. C. (2016). The Role of  
32 Online Social Support in Supporting and Educating Parents of Young Children  
33 With Special Health Care Needs in the United States: A Scoping Review. *J Med*  
34 *Internet Res*, 18(12), e333. doi:doi: 10.2196/jmir.6722
- 35 Dogba, M. J., Bedos, C., Durigova, M., Montpetit, K., Wong, T., Glorieux, F. H., &  
36 Rauch, F. (2013). The impact of severe osteogenesis imperfecta on the lives of  
37 young patients and their parents - a qualitative analysis. *BMC Pediatr*, 13(1),  
38 153. Retrieved from <https://www.ncbi.nlm.nih.gov/pubmed/24074180>
- 39 Dogba, M. J., Rauch, F., Tre, G., Glorieux, F. H., & Bedos, C. (2014). Shaping and  
40 managing the course of a child's disease: parental experiences with osteogenesis  
41 imperfecta. *Disability & Health Journal*, 7(3), 343-349. Retrieved from  
42 <https://www.ncbi.nlm.nih.gov/pubmed/24947576>
- 43 Hill, C. L., Baird, W. O., & Walters, S. J. (2014). Quality of life in children and  
44 adolescents with Osteogenesis Imperfecta: a qualitative interview based study.  
45 *Health & Quality of Life Outcomes*, 12(1), 54. Retrieved from  
46 <https://www.ncbi.nlm.nih.gov/pubmed/24742068>
- 47 Knapp, C., Madden, V., Wang, H., Sloyer, P., & Shenkman, E. (2011). Internet use and  
48 eHealth literacy of low-income parents whose children have special health care

- 1 needs. *J Med Internet Res*, 13(3), e75. Retrieved from  
2 <https://www.ncbi.nlm.nih.gov/pubmed/21960017>
- 3 Lincoln, Y. S., & Guba, E. G. (1985). *Naturalistic inquiry*. Newberry Park, CA:  
4 Sage.
- 5 Luijkx, J., Putten, A. A. J., & Vlaskamp, C. (2017). Time use of parents raising children  
6 with severe or profound intellectual and multiple disabilities. *Child: Care Health*  
7 *Dev*, 43(4), 518-526. doi:10.1111/cch.12446
- 8 Marini, J. C., Forlino, A., Bachinger, H. P., Bishop, N. J., Byers, P. H., Paepe, A., . . .  
9 Semler, O. (2017). Osteogenesis imperfecta. *Nat Rev Dis Primers*, 3, 17052.  
10 Retrieved from <https://www.ncbi.nlm.nih.gov/pubmed/28820180>
- 11 McCann, D., Bull, R., & Winzenberg, T. (2012). The daily patterns of time use for  
12 parents of children with complex needs: A systematic review. *J Child Health*  
13 *Care*, 16(1), 26-52.
- 14 Murphy, N. A., Christian, B., Caplin, D. A., & Young, P. C. (2007). The health of  
15 caregivers for children with disabilities: caregiver perspectives. *Child: Care*  
16 *Health Dev*, 33(2), 180-187. doi:10.1111/j.1365-2214.2006.00644.x
- 17 Pearlin, L. I., Mullan, J. T., Semple, S. J., & Skaff, M. M. (1990). Caregiving and the  
18 Stress Process: An Overview of Concepts and Their Measures1. *The*  
19 *Gerontologist*, 30(5), 583-594. doi:10.1093/geront/30.5.583
- 20 Pelentsov, L. J., Laws, T. A., & Esterman, A. J. (2015). The supportive care needs of  
21 parents caring for a child with a rare disease: A scoping review. *Disability &*  
22 *Health Journal*, 8(4), 475-491. doi:<https://doi.org/10.1016/j.dhjo.2015.03.009>
- 23 Polit, D., & Beck, C. (2012). *Nursing research: Generating and assessing evidence for*  
24 *nursing practice* (9 ed.). New York: Wolter Kuwer Health - Lippincott Williams  
25 & Wilkins.
- 26 Samia, L. W., O'Sullivan, A., Fallon, K. C., Aboueissa, A.-M., & Hepburn, K. W.  
27 (2018). Building on self-efficacy for experienced family caregivers: The Savvy  
28 Advanced Program. *The Gerontologist*. doi:10.1093/geront/gny016
- 29 Sandelowski, M. (2000). Whatever happened to qualitative description? *Res Nurs*  
30 *Health*, 23(4), 334-340. Retrieved from  
31 <https://www.ncbi.nlm.nih.gov/pubmed/10940958>
- 32 Santos, M. C. D., Pires, A. F., Soares, K., & Barros, L. (2017). Family experience with  
33 osteogenesis imperfecta type 1: the most distressing situations. *Disabil Rehabil*,  
34 1-7. doi:<https://dx.doi.org/10.1080/09638288.2017.1334236>
- 35 Szczepaniak-Kubat, A., Kurnatowska, O., Jakubowska-Pietkiewicz, E., & Chlebna-  
36 Sokol, D. (2012). Assessment of quality of life of parents of children with  
37 osteogenesis. *Adv Clin Exp Med*, 21(1), 99-104. Retrieved from  
38 [http://ovidsp.ovid.com/ovidweb.cgi?T=JS&PAGE=reference&D=emed14&NE](http://ovidsp.ovid.com/ovidweb.cgi?T=JS&PAGE=reference&D=emed14&NEWS=N&AN=364542406)  
39 [WS=N&AN=364542406](http://ovidsp.ovid.com/ovidweb.cgi?T=JS&PAGE=reference&D=emed14&NEWS=N&AN=364542406)
- 40 Tong, A., Sainsbury, P., & Craig, J. (2007). Consolidated criteria for reporting  
41 qualitative research (COREQ): a 32-item checklist for interviews and focus  
42 groups. *Int J Qual Health Care*, 19(6), 349-357. Retrieved from  
43 <https://www.ncbi.nlm.nih.gov/pubmed/17872937>
- 44 Trejo, P., & Rauch, F. (2016). Osteogenesis imperfecta in children and adolescents-new  
45 developments in diagnosis and treatment. *Osteoporos Int*, 27(12), 3427-3437.  
46 Retrieved from <https://www.ncbi.nlm.nih.gov/pubmed/27492436>
- 47 Vanz, A. P., Felix, T. M., da Rocha, N. S., & Schwartz, I. V. (2015). Quality of life in  
48 caregivers of children and adolescents with Osteogenesis Imperfecta. *Health &*  
49 *Quality of Life Outcomes*, 13, 41. doi:[http://dx.doi.org/10.1186/s12955-015-](http://dx.doi.org/10.1186/s12955-015-0226-4)  
50 [0226-4](http://dx.doi.org/10.1186/s12955-015-0226-4)

DAY-TO-DAY OF CAREGIVING

28

1

2

1

## Tables

2 **Table 1. Key interview questions and prompts related to day-to-day care.**

|                                                                                                             |
|-------------------------------------------------------------------------------------------------------------|
| <i>Main questions:</i>                                                                                      |
| <b>1) Can you describe what a regular day looks like when caring for your child with OI?</b>                |
| <b>2) And then can you describe a more challenging day recently?</b>                                        |
| <i>Prompts:</i>                                                                                             |
| -What are some of the duties or responsibilities of caring for a child with OI?                             |
| -How has your caring for your child changed over time?                                                      |
| -What areas of your family's life do you feel are going well?                                               |
| -What are some areas that you would like to see improve?                                                    |
| -What happens on a day with a bone break? What happens in the days that follow?                             |
| -Do you feel you know about community resources for families of children with chronic conditions?           |
| -How has caregiving affected your lifestyle and schedule? Your job? Your relationships? Your personal care? |
| -How do you feel about your social support?                                                                 |
| -Do you have access to extra help and/or care around the house?                                             |

3

4

1 Table 2. Demographic data.

| <b>Demographic Trait</b>                              | <b><u>n (individuals, unless otherwise indicated)</u></b> |
|-------------------------------------------------------|-----------------------------------------------------------|
| <b>Individuals interviewed</b>                        | 18                                                        |
| <b>Number of families represented</b>                 | 14                                                        |
| <b>Language of interview (as caregiver preferred)</b> |                                                           |
| English                                               | 12                                                        |
| French                                                | 6                                                         |
| <b>Median caregiver age in years (range)</b>          | 37.5 (24-57)                                              |
| <b>Caregiver's sex (/18 caregivers)</b>               |                                                           |
| Female                                                | 13                                                        |
| Male                                                  | 5                                                         |
| <b>Marital Status (/18 caregivers)</b>                |                                                           |
| Married or common-law                                 | 14                                                        |
| Single (never married)                                | 2                                                         |
| Separated or divorced                                 | 2                                                         |
| <b>Residential region (/14 families)</b>              |                                                           |
| Local (< 2 hours' drive from Montreal)                | 7                                                         |
| Within Quebec, not local                              | 1                                                         |
| Other Canadian region                                 | 3                                                         |
| International                                         | 3                                                         |
| <b>Highest level of education (/18 caregivers)</b>    |                                                           |
| Some post-secondary (university or college)           | 5                                                         |
| Received university or college degree/diploma         | 11                                                        |
| Postgraduate                                          | 2                                                         |
| <b>Estimated family income (/14 families)</b>         |                                                           |
| Less than \$25 000                                    | 3                                                         |
| \$25 000 - \$50 000                                   | 1                                                         |
| \$50 000 - \$80 000                                   | 1                                                         |
| More than \$80 000                                    | 7                                                         |
| Do not know                                           | 1                                                         |
| Prefers not to answer                                 | 1                                                         |
| <b>Relationship to child with OI (/18 caregivers)</b> |                                                           |
| Mother                                                | 11                                                        |
| Father                                                | 5                                                         |
| Other: legal guardian                                 | 2                                                         |
| <b>Child's OI type (/14 families)</b>                 |                                                           |
| I                                                     | 3                                                         |
| III                                                   | 4                                                         |

|                                                                                                                                                                                                                                                                                        |                                      |
|----------------------------------------------------------------------------------------------------------------------------------------------------------------------------------------------------------------------------------------------------------------------------------------|--------------------------------------|
| IV                                                                                                                                                                                                                                                                                     | 6                                    |
| VI                                                                                                                                                                                                                                                                                     | 1                                    |
| <b>Number of families with more than 1 child with OI in the household</b>                                                                                                                                                                                                              | 3                                    |
| <b>Ages of children with OI (17 children with OI)</b>                                                                                                                                                                                                                                  |                                      |
| Baby (0-12 months)                                                                                                                                                                                                                                                                     | 2                                    |
| Toddler (13 months - 3 years old)                                                                                                                                                                                                                                                      | 1                                    |
| Pre-school (4-5 years old)                                                                                                                                                                                                                                                             | 1                                    |
| School-aged (6-12 years old)                                                                                                                                                                                                                                                           | 11                                   |
| Teenager (13-18 years old)                                                                                                                                                                                                                                                             | 2                                    |
| <b>Range in number of fractures / surgeries per lifetime in the children with OI</b><br>Note: Several families did not mention the number of fractures or surgeries their children had experienced. This question was not explicitly included in our interview guide or questionnaire. | 1 - 200 fractures / 0 - 40 surgeries |
| <b>How would you describe the health of your child with OI right now? (/18 caregivers)</b>                                                                                                                                                                                             |                                      |
| Excellent                                                                                                                                                                                                                                                                              | 5                                    |
| Very good                                                                                                                                                                                                                                                                              | 4                                    |
| Good                                                                                                                                                                                                                                                                                   | 8                                    |
| Fair                                                                                                                                                                                                                                                                                   | 1                                    |
| Poor                                                                                                                                                                                                                                                                                   | 0                                    |
| <b>Family history of OI (/14 families)</b>                                                                                                                                                                                                                                             |                                      |
| Yes                                                                                                                                                                                                                                                                                    | 3                                    |
| No                                                                                                                                                                                                                                                                                     | 11                                   |

- 1 Note: This table has been adapted for this report from the demographic data table
- 2 portrayed in (\*\*\*\*Citation will be included after double-blind peer review\*\*\*\*). The two
- 3 tables are similar but not identical.
- 4
